# Supplementary material for: RALB GTPase: a critical regulator of DR5 expression and TRAIL sensitivity in KRAS mutant colorectal cancer
Source: PubMed Central journal article supplement (PMC7596570; doi:10.1038/s41419-020-03131-3), 2020-10-29

# Supplementary Figure 4

**A.**

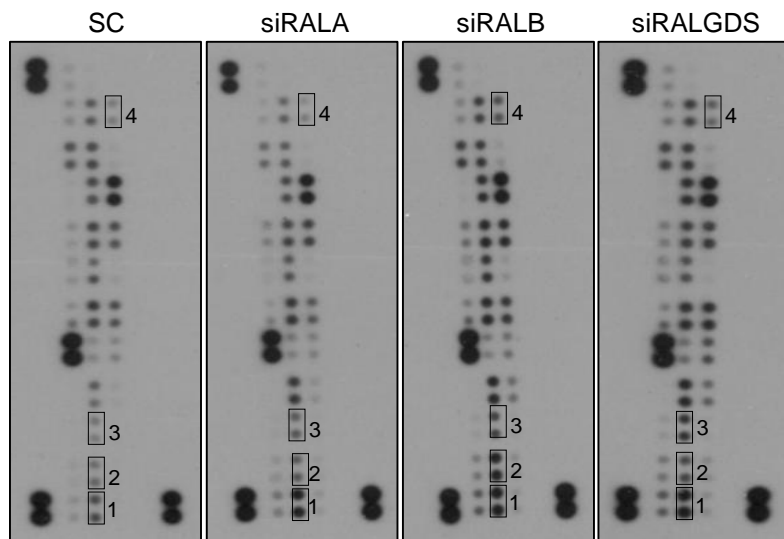

1. DR4 2. DR5 3. FAS 4. XIAP

**B.**

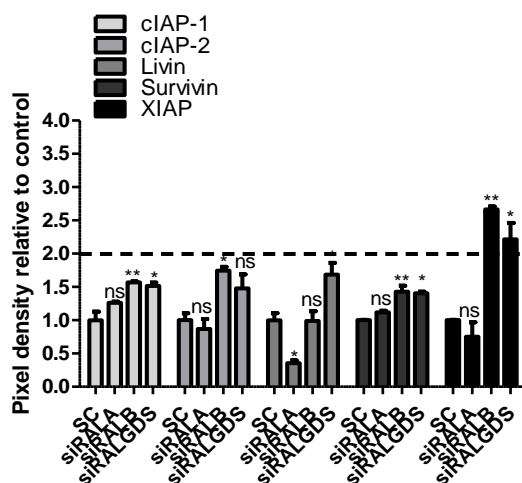

**C.**

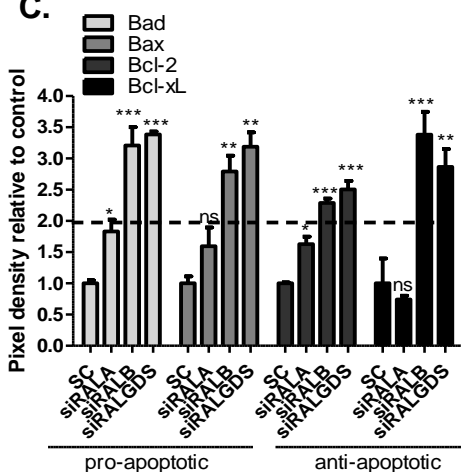

**D.**

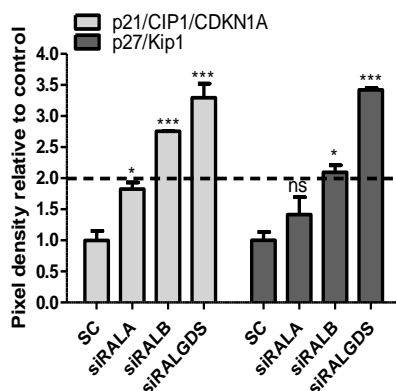

**E.**

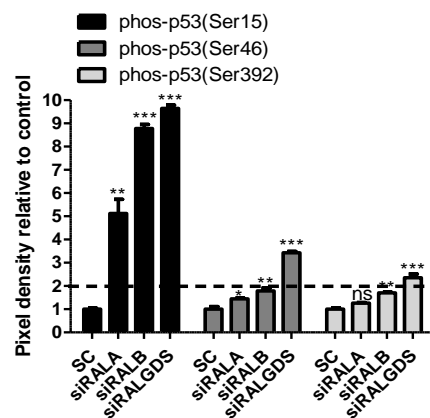

**F.**

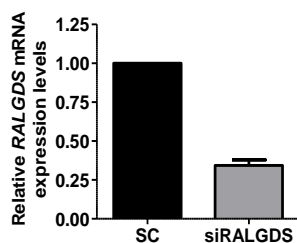

**G.**

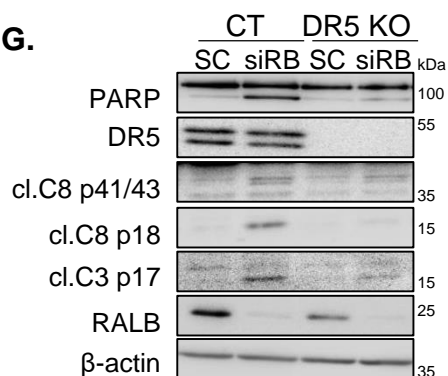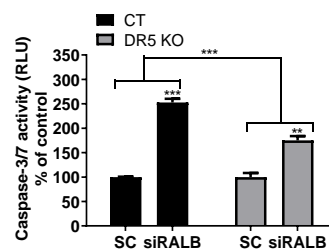

Supplement: 41419_2020_3131_MOESM4_ESM.pdf [file 41419_2020_3131_MOESM4_ESM.pdf]
