# Supplementary material for: RALB GTPase: a critical regulator of DR5 expression and TRAIL sensitivity in KRAS mutant colorectal cancer
Source: PubMed Central journal article supplement (PMC7596570; doi:10.1038/s41419-020-03131-3), 2020-10-29
Supplement: 41419_2020_3131_MOESM7_ESM.pdf [file 41419_2020_3131_MOESM7_ESM.pdf]

**Supplementary Table 1**

| <b>Antibody</b>                         | <b>Supplier</b>            | <b>Product code</b> | <b>Application</b>               |
|-----------------------------------------|----------------------------|---------------------|----------------------------------|
| Anti-human CD262 (DR5)<br>PE            | ThermoFisher Scientific    | 12-9908-42          | Flow cytometry                   |
| Anti-mouse HRP                          | Cell Signalling Technology | 7076                | Western blot                     |
| Anti-Rabbit HRP                         | Cell Signalling Technology | 7074                | Western blot                     |
| AP2 $\alpha$                            | Abcam                      | ab2730              | Western blot                     |
| Bcl-xL (54H6)                           | Cell Signalling Technology | 2764                | Western blot                     |
| Calnexin                                | Abcam                      | 22595               | Immunofluorescence               |
| Caspase-8 (12F5)                        | Enzo                       | ALX-804-242-C100    | Western blot                     |
| Caspase-9                               | Cell Signalling Technology | 9502                | Western blot                     |
| CHOP                                    | Cell Signalling Technology | 2895                | Western blotting                 |
| Cleaved Caspase-3                       | Cell Signalling Technology | 9661                | Western blot                     |
| DR4 (D9S1R)                             | Cell Signalling Technology | 42533               | Western blot                     |
| DR5 (D4E9) XP $\text{\textcircled{R}}$  | Cell Signalling Technology | 8074                | Western blot, Immunofluorescence |
| EGFR                                    | BD Biosciences             | 610017              | Western blot                     |
| ERK1/2                                  | Cell Signalling Technology | 9102                | Western blot                     |
| FADD (A66-2)                            | BD Biosciences             | 556402              | Western blot                     |
| FLAG (M2) HRP                           | Sigma                      | A8592               | Western blot                     |
| FLIP (NF6)                              | Cal tag medsystems         | AG-20B-0056-C100    | Western blot                     |
| GAPDH                                   | Novus Biologicals          | NB300-221           | Western blot                     |
| IKB $\alpha$                            | Cell Signalling Technology | 9242                | Western blotting                 |
| LAMP1                                   | Abcam                      | ab25630             | Immunofluorescence               |
| LC3-A/B                                 | Cell Signalling Technology | 12741               | Western blot                     |
| Mcl-1                                   | BD Transduction            | 559027              | Western blot                     |
| MEK1/2                                  | Cell Signalling Technology | 9122                | Western blot                     |
| Mouse IgG1 kappa<br>isotype control, PE | ThermoFisher Scientific    | 12-4714-41          | Flow cytometry                   |
| Myc-Tag (71D10)                         | Cell Signalling Technology | 2278                | Western blot                     |
| p53 (DO-1)                              | Santa Cruz                 | sc-126              | Western blot                     |
| p65                                     | Santa Cruz                 | sc-8008             | Western blot                     |
| PARP                                    | Cell Signalling Technology | 9542                | Western blot                     |
| pERK1/2 (Thr202/Tyr204)                 | Cell Signalling Technology | 9101                | Western blot                     |
| pMEK1/2 (Ser217/221)                    | Cell Signalling Technology | 9154                | Western blot                     |
| pTBK1 (Ser172)                          | Cell Signalling Technology | 5483                | Western blot                     |
| RALA                                    | BD Transduction            | 610221              | Western blot                     |
| RALB                                    | Cell Signalling Technology | 3523                | Western blot                     |
| TBK1                                    | Cell Signalling Technology | 3504                | Western blot                     |
| TGN46                                   | Bio-Rad                    | AHP500GT            | Immunofluorescence               |
| XIAP                                    | Cell Signalling Technology | 2042                | Western blot                     |
| $\beta$ -actin (AC-74)                  | Sigma                      | A2228               | Western blot                     |
